# Supplementary material for: DeepCDpred: Inter-residue distance and contact prediction for improved prediction of protein structure
Source: PubMed Central journal article supplement (PMC6324825; doi:10.1371/journal.pone.0205214), 2019-01-08
Supplement: pone.0205214.s002.pdf [file pone.0205214.s002.pdf]

**Table 1. Parameters of the contact and distance constraints.**

| Range /Å    | DeepCDpred score ( $s$ ) | Upper boundary     | Lower boundary   | Standard deviation | Weight |
|-------------|--------------------------|--------------------|------------------|--------------------|--------|
| bin 0 - 8   | $\geq 0.9$               |                    |                  | 0.5                | 2.5    |
|             | $\geq 0.8$ & $< 0.9$     | $-10.8 * s + 16.7$ | 3.2              | 0.7                | 1.5    |
|             | $< 0.8$                  |                    |                  | 1.0                | 1.0    |
| bin 8 - 13  | $\geq 0.8$               | $-12 * s + 23.5$   | 7.5              | 1                  | 1.5    |
|             | $< 0.8$                  |                    |                  | 1.5                | 0.5    |
| bin 13 - 18 | $\geq 0.8$               | $-8.6 * s + 25.17$ | $8.6 * s + 4.84$ | 1.5                | 0.8    |
|             | $< 0.8$                  |                    |                  | 1.0                | 0.3    |
| bin 18 - 23 | $\geq 0.8$               | $-7.2 * s + 29.2$  | $7.2 * s + 11.2$ | 1.5                | 0.6    |
|             | $< 0.8$                  |                    |                  | 1.0                | 0.3    |
