# Supplementary material for: DeepCDpred: Inter-residue distance and contact prediction for improved prediction of protein structure
Source: PubMed Central journal article supplement (PMC6324825; doi:10.1371/journal.pone.0205214), 2019-01-08
Supplement: pone.0205214.s003.pdf [file pone.0205214.s003.pdf]

**Table 2. Comparison of average TM-scores of the structure pools with 100 vs. 200 models.**

|                            | Lowest Rosetta Energy <sup>1</sup> |                     |                      | Model with highest TM compared to experimental structure |                     |                      |
|----------------------------|------------------------------------|---------------------|----------------------|----------------------------------------------------------|---------------------|----------------------|
|                            | Average TM from 100                | Average TM from 200 | p-value <sup>2</sup> | Average TM from 100                                      | Average TM from 200 | p-value <sup>2</sup> |
| RaptorX contact only (108) | 0.667                              | 0.665               | 0.320                | 0.766                                                    | 0.775               | 0.04                 |
| RaptorX + Distance (108)   | 0.720                              | 0.737               | 0.008                | 0.780                                                    | 0.786               | $7 \times 10^{-5}$   |
| RaptorX contact only (50)  | 0.493                              | 0.494               | 0.831                | 0.557                                                    | 0.568               | $1 \times 10^{-5}$   |
| RaptorX + Distance (50)    | 0.516                              | 0.515               | 0.850                | 0.561                                                    | 0.576               | $8 \times 10^{-5}$   |

<sup>1</sup>Average TM, compared to experimental structure, of the model with lowest Rosetta energy model for each of the 108 proteins and the 50 proteins in the test sets, when using a pool of 100 or 200 models, per protein, to select from. <sup>2</sup>Paired t-test.
