# Supplementary material for: DeepCDpred: Inter-residue distance and contact prediction for improved prediction of protein structure
Source: PubMed Central journal article supplement (PMC6324825; doi:10.1371/journal.pone.0205214), 2019-01-08
Supplement: pone.0205214.s004.pdf [file pone.0205214.s004.pdf]

**Table 3. PDB ID list of the test set with 108 proteins.**

|       |       |       |       |       |       |       |       |
|-------|-------|-------|-------|-------|-------|-------|-------|
| 1a3aA | 1cc8A | 1dsxA | 1gzcA | 1im5A | 1ku3A | 1p90A | 1vjkA |
| 1aapA | 1chdA | 1eazA | 1h2eA | 1j3aA | 1kw4A | 1pchA | 1vmbA |
| 1abaA | 1cjwA | 1ej8A | 1h4xA | 1jfuA | 1lm4A | 1qf9A | 1vp6A |
| 1ag6A | 1ckeA | 1f6bA | 1hdoA | 1jl1A | 1lo7A | 1qjpA | 1w0hA |
| 1aoeA | 1ctfA | 1fcyA | 1hfcA | 1jo0A | 1m4jA | 1r26A | 1whiA |
| 1atzA | 1cxyA | 1fk5A | 1hh8A | 1jo8A | 1m8aA | 1roaA | 1wjxA |
| 1avsA | 1cznA | 1fl0A | 1htwA | 1josA | 1mk0A | 1rw1A | 1wkcA |
| 1bdoA | 1d0qA | 1fvGA | 1hxnA | 1jwqA | 1mugA | 1smxA | 1xffA |
| 1bebA | 1d1qA | 1fx2A | 1i1jA | 1jyhA | 1nb9A | 1svyA | 2cuaA |
| 1behA | 1d4oA | 1g2rA | 1i1nA | 1k6kA | 1ne2A | 1t8kA | 2phyA |
| 1bkrA | 1dixA | 1g9oA | 1i4jA | 1k7jA | 1npsA | 1tifa | 1c44A |
| 1dlwA | 1gmiA | 1i58A | 1kq6A | 1nrvA | 1tqgA | 1c52A | 1dmgA |
| 1gmxA | 1i71A | 1kqrA | 1ny1A | 1tqhA | 1c9oA | 1dqgA | 1gz2A |
| 1iibA | 1ktgA | 1o1zA | 1vfyA |       |       |       |       |
