# Supplementary material for: DeepCDpred: Inter-residue distance and contact prediction for improved prediction of protein structure
Source: PubMed Central journal article supplement (PMC6324825; doi:10.1371/journal.pone.0205214), 2019-01-08
Supplement: pone.0205214.s005.pdf [file pone.0205214.s005.pdf]

**Table 4. PDB ID list of the test set with 50 proteins.**

|       |       |       |       |       |
|-------|-------|-------|-------|-------|
| 1b12A | 1ckmA | 1d0qA | 1dd9A | 1dmgA |
| 1e1hA | 1e1hB | 1g2rA | 1hufA | 1i71A |
| 1inpA | 1io1A | 1j3aA | 1o9iA | 1okcA |
| 1r71A | 1rajA | 1sknP | 1svbA | 1tgrA |
| 1w2yA | 1whiA | 1wjxA | 1yrtA | 1yu5X |
| 1ywmA | 2j7aC | 2p84A | 2rhkC | 2vnlA |
| 2wqiA | 3bl9B | 3bqwA | 3girA | 3hrdB |
| 3o79A | 3pn3A | 3rioA | 3rlfG | 3ts2A |
| 3vtoQ | 3x02A | 3x34A | 4x8yA | 4xb4A |
| 4ymuC | 4z6mA | 5b66O | 5hobA | 5hocA |
