# Supplementary material for: DeepCDpred: Inter-residue distance and contact prediction for improved prediction of protein structure
Source: PubMed Central journal article supplement (PMC6324825; doi:10.1371/journal.pone.0205214), 2019-01-08
Supplement: pone.0205214.s006.pdf [file pone.0205214.s006.pdf]

**Table 5. PDB ID list of additional test set with 11 proteins.**

|       |       |       |       |       |
|-------|-------|-------|-------|-------|
| 1af7A | 1ddgA | 1dl5A | 1fjrA | 1fn9A |
| 1h3iA | 1h6wA | 1iomA | 1noyA | 1rkuA |
| 1rzhA |       |       |       |       |
